# Supplementary material for: Spatial changes in zooplankton communities in a strong human-mediated river ecosystem
Source: PeerJ. 2018 Jul 3;6:e5087. doi: 10.7717/peerj.5087 (PMC6034592; doi:10.7717/peerj.5087)
Supplement: Data S1 — First part of the data used in the statistical computations published within our publication. [file peerj-06-5087-s001.xls]

## Sheet: Environmental factors
			Environmental factors			number of dams above the site in the Barycz river	distance between the site in the Barycz river and the closest carp pond in the pond system	number of carp pond outlets (T) above the site in the Barycz river
			(µg l-1)	(m3 s-1)	(m s-1)		(km)
	Site	Month/year	Chlorophyll_a	Discharge	Current velocity	ND	DCP	NCO
Lotic section	R 1	April 13	0.8	0.479	0.36	0
Lotic section	R 1	May 13	5.8	0.374	0.34	0
Lotic section	R 1	June 13	2.4	0.356	0.31	0
Lotic section	R 1	July 13	1.3	0.246	0.25	0
Lotic section	R 1	August 13	6.8	0.203	0.22	0
Lotic section	R 1	September 13	2.1	0.254	0.29	0
Lotic section	R 1	October 13	4.3	0.282	0.31	0
Lotic section	R 1	April 14	0.9	0.46	0.36	0
Lotic section	R 1	May 14	6.7	0.283	0.3	0
Lotic section	R 1	June 14	2.6	0.241	0.29	0
Lotic section	R 1	July 14	1.4	0.131	0.18	0
Lotic section	R 1	August 14	7.1	0.092	0.17	0
Lotic section	R 1	September 14	4.6	0.137	0.22	0
Lotic section	R 1	October 14	4.6	0.21	0.24	0
Impoundment	D 1	April 13	1.7	0.602	0.1	5	9.7	1
Impoundment	D 1	May 13	13.5	0.47	0.09	5	9.7	1
Impoundment	D 1	June 13	3.6	0.448	0.09	5	9.7	1
Impoundment	D 1	July 13	3.6	0.309	0.09	5	9.7	1
Impoundment	D 1	August 13	9.2	0.255	0.06	5	9.7	1
Impoundment	D 1	September 13	14	0.319	0.08	5	9.7	1
Impoundment	D 1	October 13	8.7	0.354	0.08	5	9.7	1
Impoundment	D 1	April 14	1.9	0.579	0.09	5	9.7	1
Impoundment	D 1	May 14	15.6	0.356	0.08	5	9.7	1
Impoundment	D 1	June 14	3.9	0.303	0.08	5	9.7	1
Impoundment	D 1	July 14	3.8	0.164	0.06	5	9.7	1
Impoundment	D 1	August 14	9.7	0.116	0.06	5	9.7	1
Impoundment	D 1	September 14	18.2	0.173	0.07	5	9.7	1
Impoundment	D 1	October 14	9.2	0.264	0.06	5	9.7	1
Lotic section	R 2	April 13	2.1	3.569	0.31	8	15	1
Lotic section	R 2	May 13	10.2	2.789	0.28	8	15	1
Lotic section	R 2	June 13	3.3	2.656	0.27	8	15	1
Lotic section	R 2	July 13	9.7	1.832	0.22	8	15	1
Lotic section	R 2	August 13	17	1.514	0.18	8	15	1
Lotic section	R 2	September 13	15	1.892	0.24	8	15	1
Lotic section	R 2	October 13	7.7	2.1	0.25	8	15	1
Lotic section	R 2	April 14	2.4	3.432	0.3	8	15	1
Lotic section	R 2	May 14	11.7	2.113	0.25	8	15	1
Lotic section	R 2	June 14	3.5	1.794	0.24	8	15	1
Lotic section	R 2	July 14	10.1	0.974	0.15	8	15	1
Lotic section	R 2	August 14	17.9	0.688	0.14	8	15	1
Lotic section	R 2	September 14	24.6	1.023	0.18	8	15	1
Lotic section	R 2	October 14	8.2	1.567	0.21	8	15	1
Impoundment	D 2	April 13	4.5	3.859	0.09	11	0.3	2
Impoundment	D 2	May 13	14.6	3.015	0.08	11	0.3	2
Impoundment	D 2	June 13	4.3	2.871	0.08	11	0.3	2
Impoundment	D 2	July 13	10.5	1.98	0.07	11	0.3	2
Impoundment	D 2	August 13	24	1.637	0.05	11	0.3	2
Impoundment	D 2	September 13	16.7	2.046	0.07	11	0.3	2
Impoundment	D 2	October 13	12.1	2.271	0.07	11	0.3	2
Impoundment	D 2	April 14	5	3.711	0.08	11	0.3	2
Impoundment	D 2	May 14	16.8	2.284	0.07	11	0.3	2
Impoundment	D 2	June 14	4.6	1.94	0.06	11	0.3	2
Impoundment	D 2	July 14	10.9	1.053	0.04	11	0.3	2
Impoundment	D 2	August 14	25.2	0.744	0.05	11	0.3	2
Impoundment	D 2	September 14	26.9	1.106	0.04	11	0.3	2
Impoundment	D 2	October 14	12.9	1.695	0.05	11	0.3	2
Impoundment	D 3	April 13	6.4	4.262	0.1	13	0.1	3
Impoundment	D 3	May 13	19	3.33	0.09	13	0.1	3
Impoundment	D 3	June 13	8.6	3.171	0.07	13	0.1	3
Impoundment	D 3	July 13	8.3	2.187	0.06	13	0.1	3
Impoundment	D 3	August 13	25.9	1.808	0.04	13	0.1	3
Impoundment	D 3	September 13	14.1	2.259	0.06	13	0.1	3
Impoundment	D 3	October 13	17.4	2.508	0.06	13	0.1	3
Impoundment	D 3	April 14	7.1	4.098	0.08	13	0.1	3
Impoundment	D 3	May 14	21.8	2.523	0.07	13	0.1	3
Impoundment	D 3	June 14	9.3	2.143	0.04	13	0.1	3
Impoundment	D 3	July 14	8.6	1.163	0.04	13	0.1	3
Impoundment	D 3	August 14	27.2	0.822	0.05	13	0.1	3
Impoundment	D 3	September 14	36.9	1.221	0.05	13	0.1	3
Impoundment	D 3	October 14	18.5	1.872	0.05	13	0.1	3
Impoundment	D 4	April 13	5.1	4.558	0.09	15	0.1	4
Impoundment	D 4	May 13	21.9	3.561	0.07	15	0.1	4
Impoundment	D 4	June 13	8.7	3.391	0.06	15	0.1	4
Impoundment	D 4	July 13	13	2.339	0.04	15	0.1	4
Impoundment	D 4	August 13	28.4	1.933	0.03	15	0.1	4
Impoundment	D 4	September 13	24.1	2.416	0.04	15	0.1	4
Impoundment	D 4	October 13	19.7	2.682	0.04	15	0.1	4
Impoundment	D 4	April 14	5.6	4.382	0.08	15	0.1	4
Impoundment	D 4	May 14	25.1	2.698	0.05	15	0.1	4
Impoundment	D 4	June 14	9.4	2.291	0.03	15	0.1	4
Impoundment	D 4	July 14	13.5	1.244	0.02	15	0.1	4
Impoundment	D 4	August 14	29.8	0.879	0.02	15	0.1	4
Impoundment	D 4	September 14	29.9	1.306	0.03	15	0.1	4
Impoundment	D 4	October 14	20.9	2.001	0.03	15	0.1	4
Lotic section	R 3	April 13	3.6	4.709	0.22	16	7.3	4
Lotic section	R 3	May 13	12.6	3.679	0.2	16	7.3	4
Lotic section	R 3	June 13	6.4	3.504	0.19	16	7.3	4
Lotic section	R 3	July 13	3.8	2.417	0.16	16	7.3	4
Lotic section	R 3	August 13	21.8	1.997	0.13	16	7.3	4
Lotic section	R 3	September 13	17.1	2.496	0.17	16	7.3	4
Lotic section	R 3	October 13	12.5	2.771	0.18	16	7.3	4
Lotic section	R 3	April 14	3.9	4.528	0.21	16	7.3	4
Lotic section	R 3	May 14	14.5	2.787	0.18	16	7.3	4
Lotic section	R 3	June 14	6.9	2.368	0.17	16	7.3	4
Lotic section	R 3	July 14	4	1.285	0.11	16	7.3	4
Lotic section	R 3	August 14	22.9	0.908	0.1	16	7.3	4
Lotic section	R 3	September 14	18.7	1.349	0.13	16	7.3	4
Lotic section	R 3	October 14	13.2	2.068	0.15	16	7.3	4
Impoundment	D 5	April 13	10.1	7.642	0.05	23	6.9	5
Impoundment	D 5	May 13	24.7	5.97	0.04	23	6.9	5
Impoundment	D 5	June 13	11.3	5.686	0.04	23	6.9	5
Impoundment	D 5	July 13	18.8	3.921	0.02	23	6.9	5
Impoundment	D 5	August 13	36.7	3.241	0.01	23	6.9	5
Impoundment	D 5	September 13	30.6	4.051	0.02	23	6.9	5
Impoundment	D 5	October 13	19	4.496	0.02	23	6.9	5
Impoundment	D 5	April 14	11.2	7.348	0.05	23	6.9	5
Impoundment	D 5	May 14	28.4	4.523	0.03	23	6.9	5
Impoundment	D 5	June 14	12.2	3.842	0.01	23	6.9	5
Impoundment	D 5	July 14	19.6	2.086	0.01	23	6.9	5
Impoundment	D 5	August 14	38.5	1.473	0.01	23	6.9	5
Impoundment	D 5	September 14	38.8	2.19	0.01	23	6.9	5
Impoundment	D 5	October 14	20.1	3.356	0.01	23	6.9	5
Lotic section	R 4	April 13	6.4	10.316	0.52	31	36	5
Lotic section	R 4	May 13	15.8	8.06	0.47	31	36	5
Lotic section	R 4	June 13	7.3	7.676	0.44	31	36	5
Lotic section	R 4	July 13	12.1	5.294	0.36	31	36	5
Lotic section	R 4	August 13	23.5	4.375	0.32	31	36	5
Lotic section	R 4	September 13	19.6	5.469	0.35	31	36	5
Lotic section	R 4	October 13	12.2	6.07	0.4	31	36	5
Lotic section	R 4	April 14	7.2	9.92	0.5	31	36	5
Lotic section	R 4	May 14	18.2	6.106	0.45	31	36	5
Lotic section	R 4	June 14	7.8	5.186	0.43	31	36	5
Lotic section	R 4	July 14	12.6	2.816	0.32	31	36	5
Lotic section	R 4	August 14	24.7	1.989	0.3	31	36	5
Lotic section	R 4	September 14	24.9	2.956	0.25	31	36	5
Lotic section	R 4	October 14	12.9	4.53	0.28	31	36	5
